61. Edelman DA, Jiang Y, Tyburski J, Wilson RF, Steffes C: Toll-like receptor-4 message is up-regulated in lipopolysaccharide-exposed rat lung pericytes. *J Surg Res* 2006; 134:22–7
62. Yu M, Shao D, Liu J, Zhu J, Zhang Z, Xu J: Effects of ketamine on levels of cytokines, NF-kappaB and TLRs in rat intestine during CLP-induced sepsis. *Int Immunopharmacol* 2007; 7:1076–82
63. Xiao SD, Zhang DZ, Lu H, Jiang SH, Liu HY, Wang GS, Xu GM, Zhang ZB, Lin GJ, Wang GL: Multicenter, randomized, controlled trial of heat-killed *Lactobacillus acidophilus* LB in patients with chronic diarrhea. *Adv Ther* 2003; 20:253–60
64. Hempel S NS, Ruelaz A, Wang Z, Miles JNV, Suttorp MJ, Johnsen B, Shanman R, Slusser W, Fu N, Smith A, Roth E, Polak J, Motala A, Perry T, Shekelle PG: Safety of Probiotics to Reduce Risk and Prevent or Treat Disease. Evidence Report/Technology Assessment No. 200. AHRQ Publication No. 11-E007 April 2011
65. De Groote MA, Frank DN, Dowell E, Glode MP, Pace NR: *Lactobacillus rhamnosus* GG bacteremia associated with probiotic use in a child with short gut syndrome. *Pediatr Infect Dis J* 2005; 24:278–80
66. Besselink MG, van Santvoort HC, Buskens E, Boermeester MA, van Goor H, Timmerman HM, Nieuwenhuijs VB, Bollen TL, van Ramshorst B, Witteman BJ, Rosman C, Ploeg RJ, Brink MA, Schaapherder AF, Dejong CH, Wahab PJ, van Laarhoven CJ, van der Harst E, van Eijck CH, Cuesta MA, Akkermans LM, Gooszen HG; Dutch Acute Pancreatitis Study Group: Probiotic prophylaxis in predicted severe acute pancreatitis: A randomised, double-blind, placebo-controlled trial. *Lancet* 2008; 371:651–9
67. Morrow LE, Gogineni V, Malesker MA: Synbiotics and probiotics in the critically ill after the PROPATRIA trial. *Curr Opin Clin Nutr Metab Care* 2012; 15:147–50

## ANESTHESIOLOGY REFLECTIONS FROM THE WOOD LIBRARY-MUSEUM

### De Jarnette's Optic Chromatic System of Anesthesia

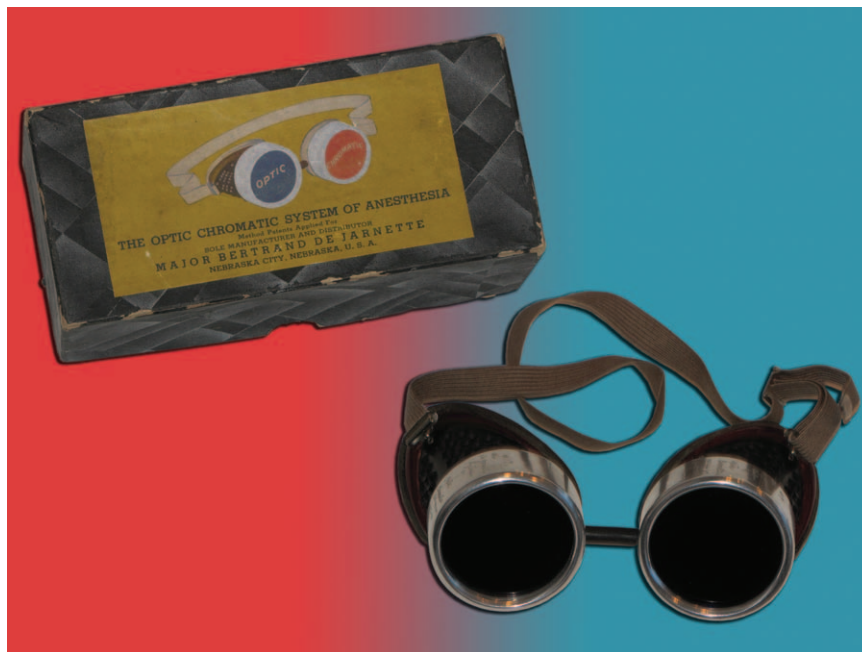

Conceived (1926), marketed (1928), withdrawn (1931), and remarketed (1939), the “Optic Chromatic System of Anesthesia” was invented by Major Bertrand De Jarnette (1899–1992). An engineer, osteopathic physician, and chiropractor, he wrote that “each thalami” [*sic*] of the brain has large masses of sensory fibers [that] pass through.” De Jarnette assumed that a “slow movement is never associated with red, while a fast stimuli [*sic*] is never associated with blue.” By “the addition of red” color to “blue and deep violet” lenses, De Jarnette produced goggles (*right*) that he “designed for BLOODLESS SURGERY and not orthopedic work.” For advertising purposes, the shipping box (*left*) depicts goggles with one lens blue, the other one red. By illuminating goggled patients with a 75 W white light that he first switched on-and-off at a 2:1 ratio and then followed with continuous white light, De Jarnette aimed to lessen pain from chiropractic manipulations involving the “abdomen and pelvis” but not the extremities. As for others’ doubts, he noted that “science is never without scoffers.” In 1940 De Jarnette filed a U.S. Patent application for his anesthetic goggles. It was declined. (Copyright © the American Society of Anesthesiologists, Inc.)

George S. Bause, M.D., M.P.H., Honorary Curator, ASA’s Wood Library-Museum of Anesthesiology, Park Ridge, Illinois, and Clinical Associate Professor, Case Western Reserve University, Cleveland, Ohio. UJYC@aol.com.
